# Supplementary material
Source: PubMed Central journal article supplement (PMC3438501)
Supplement: cdd201252x3.pdf [file cdd201252x3.pdf]

**a**

**Infantile-onset GSDII patients**

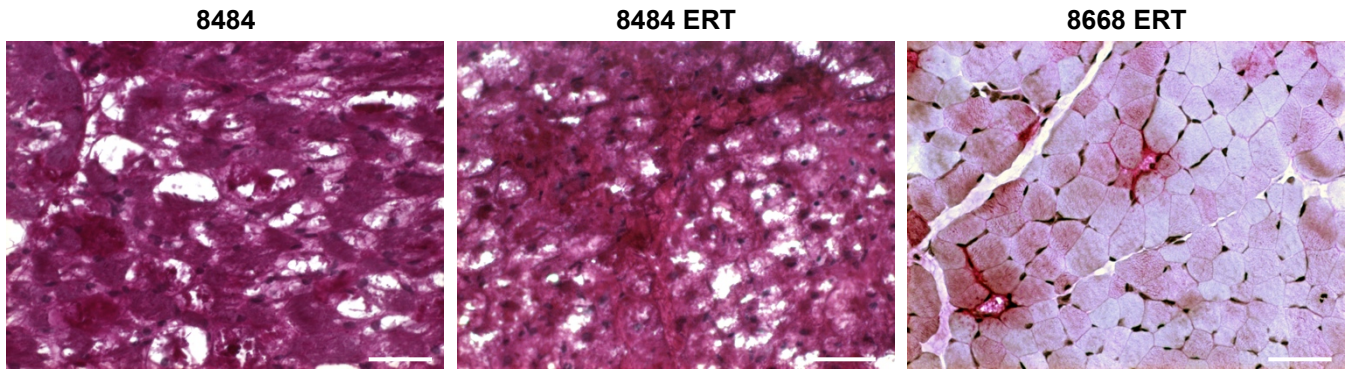

**b**

**Adult-onset GSDII patient**

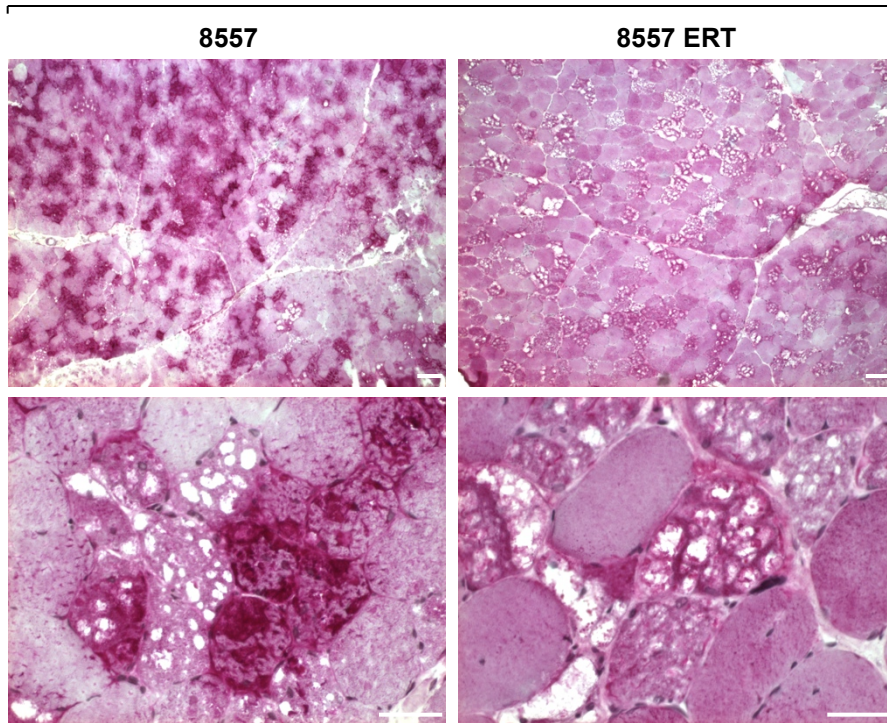

**Figure S2.** PAS staining of pre- and post-ERT biopsies in infantile and adult-onset GSDII patients. **(a)** Infantile-onset GSDII patients (8484: pre-ERT biopsy; 8484 ERT: post-ERT biopsy; ERT started at 8 months; 8668 ERT: post-ERT biopsy; ERT started at 3 weeks). **(b)** Adult-onset GSDII patient (8557: pre-ERT biopsy; 8557 ERT: post-ERT biopsy). Bar: 40µm.
