# Supplementary material
Source: PubMed Central journal article supplement (PMC3438501)
Supplement: cdd201252x4.pdf [file cdd201252x4.pdf]

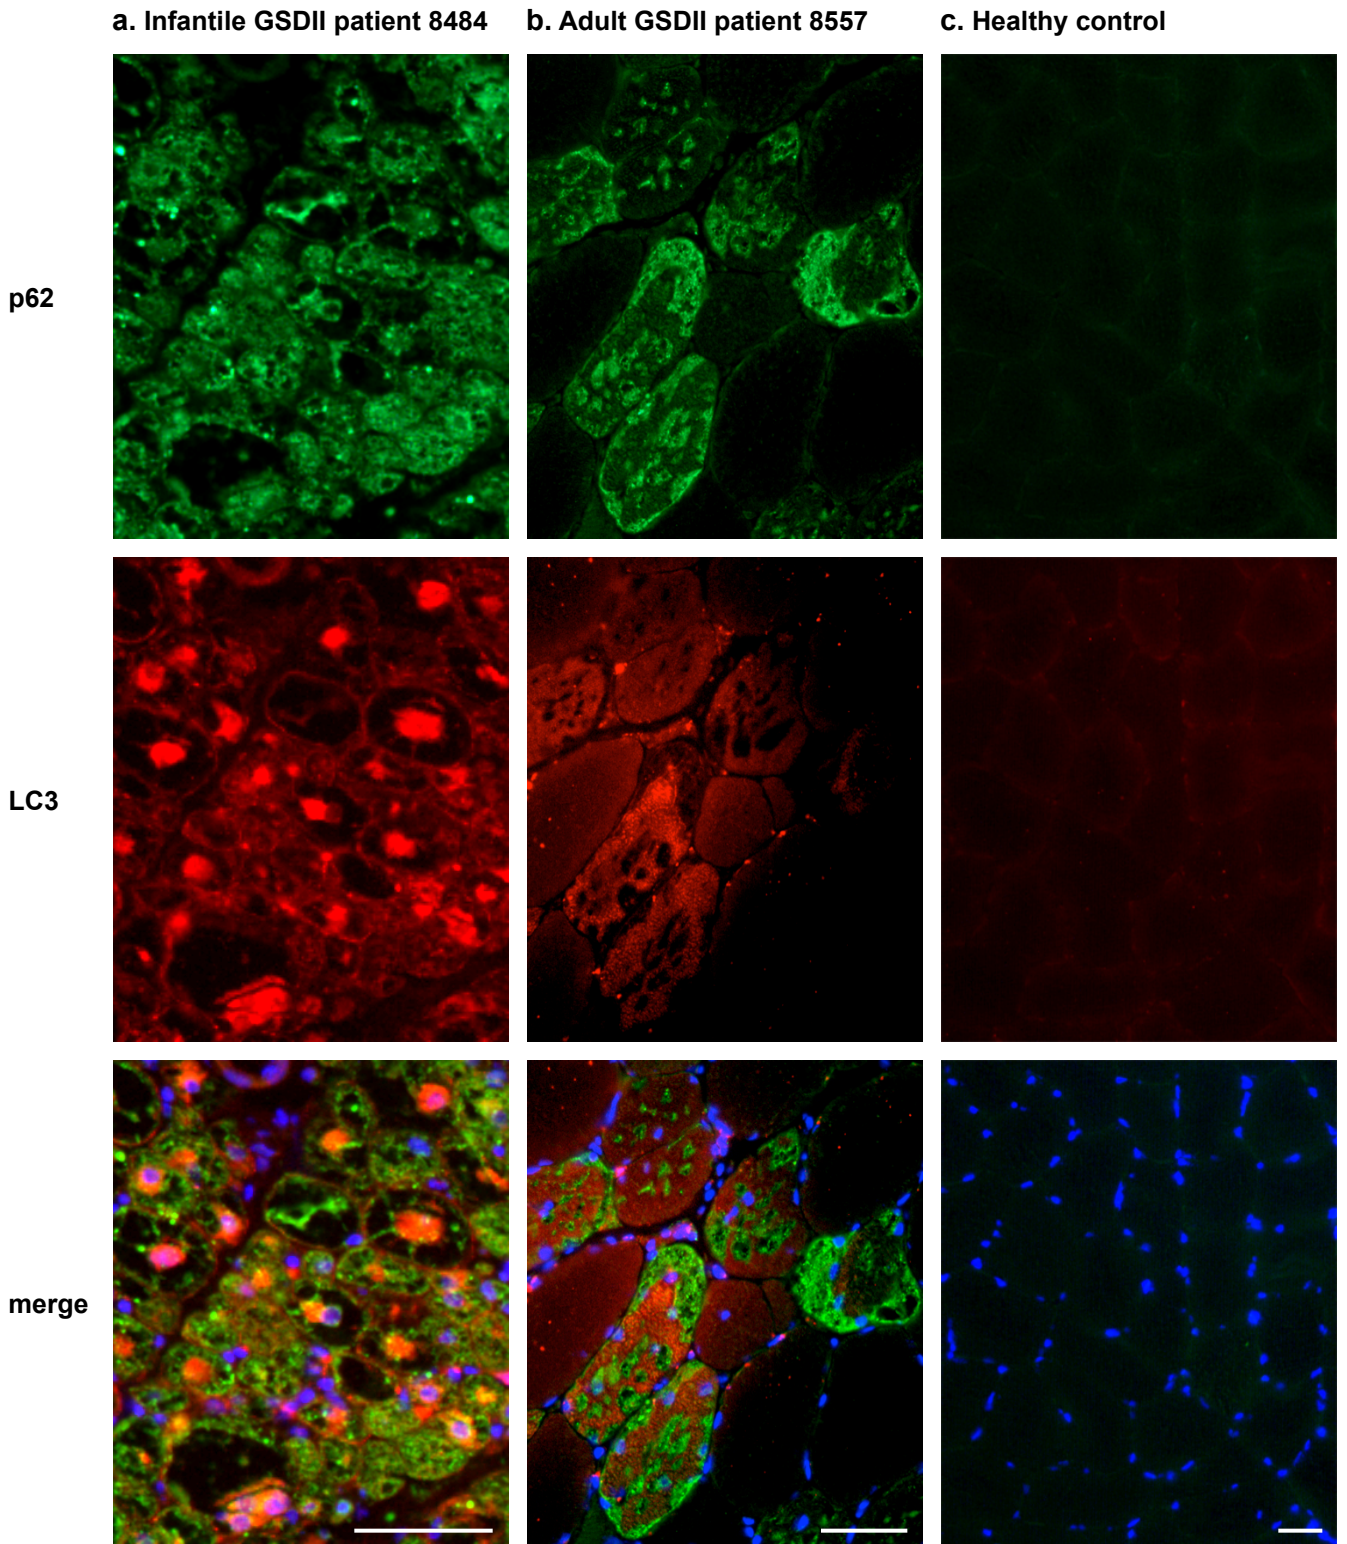

**Figure S3.** Autophagic accumulation in infantile (a), adult-onset (b) GSDII patients and control (c). Immunofluorescence analysis of muscle biopsies for p62-positive aggregates (green), LC3 puncta (red) and DAPI (blue) in infantile-onset (8484), adult-onset (8557) GSDII patients and healthy adult control. Bar: 40µm.
