# Supplementary material
Source: PubMed Central journal article supplement (PMC3438501)
Supplement: cdd201252x5.pdf [file cdd201252x5.pdf]

a.

Adult patient 8557

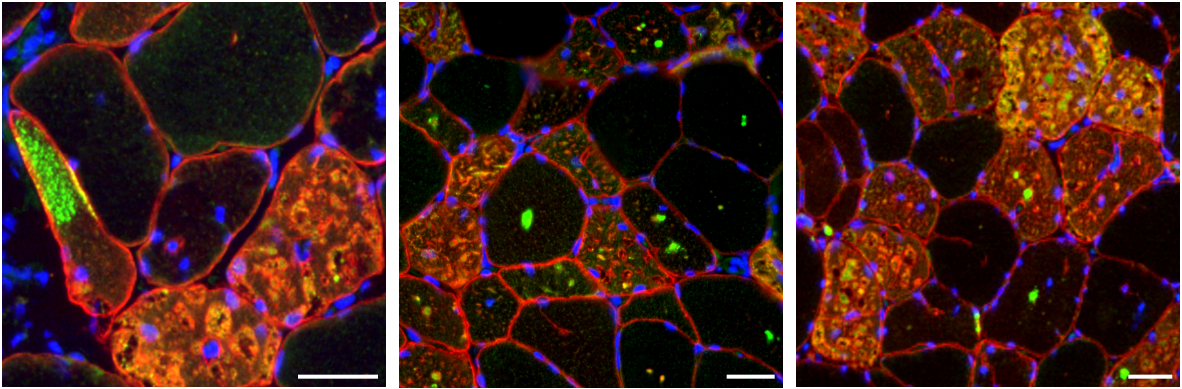

b.

Healthy control

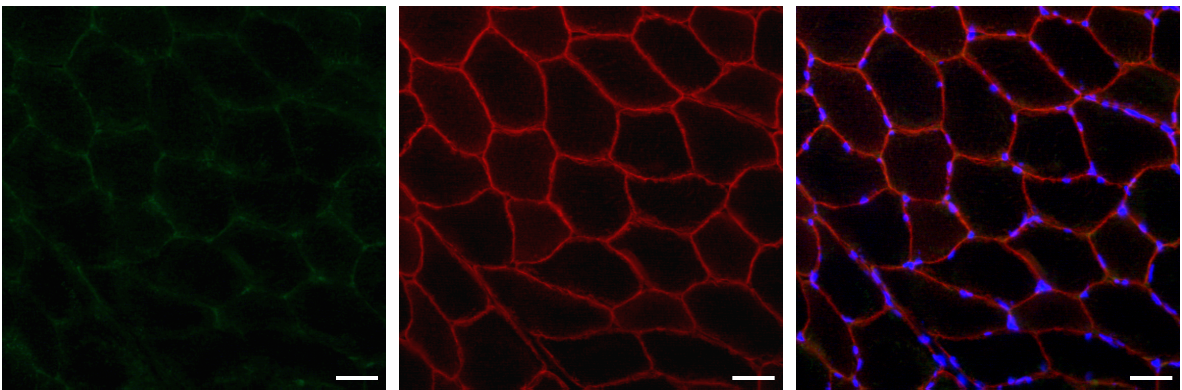

**Figure S4.** P62-positive aggregates are present in non-vacuolated muscle fibers in a GSDII adult patient (a). Immunofluorescence analysis for p62 (green), cav3 (red) and DAPI (blue). (b) Healthy control. Bar: 40 $\mu$ m.
