# Supplementary material
Source: PubMed Central journal article supplement (PMC3438501)
Supplement: cdd201252x6.pdf [file cdd201252x6.pdf]

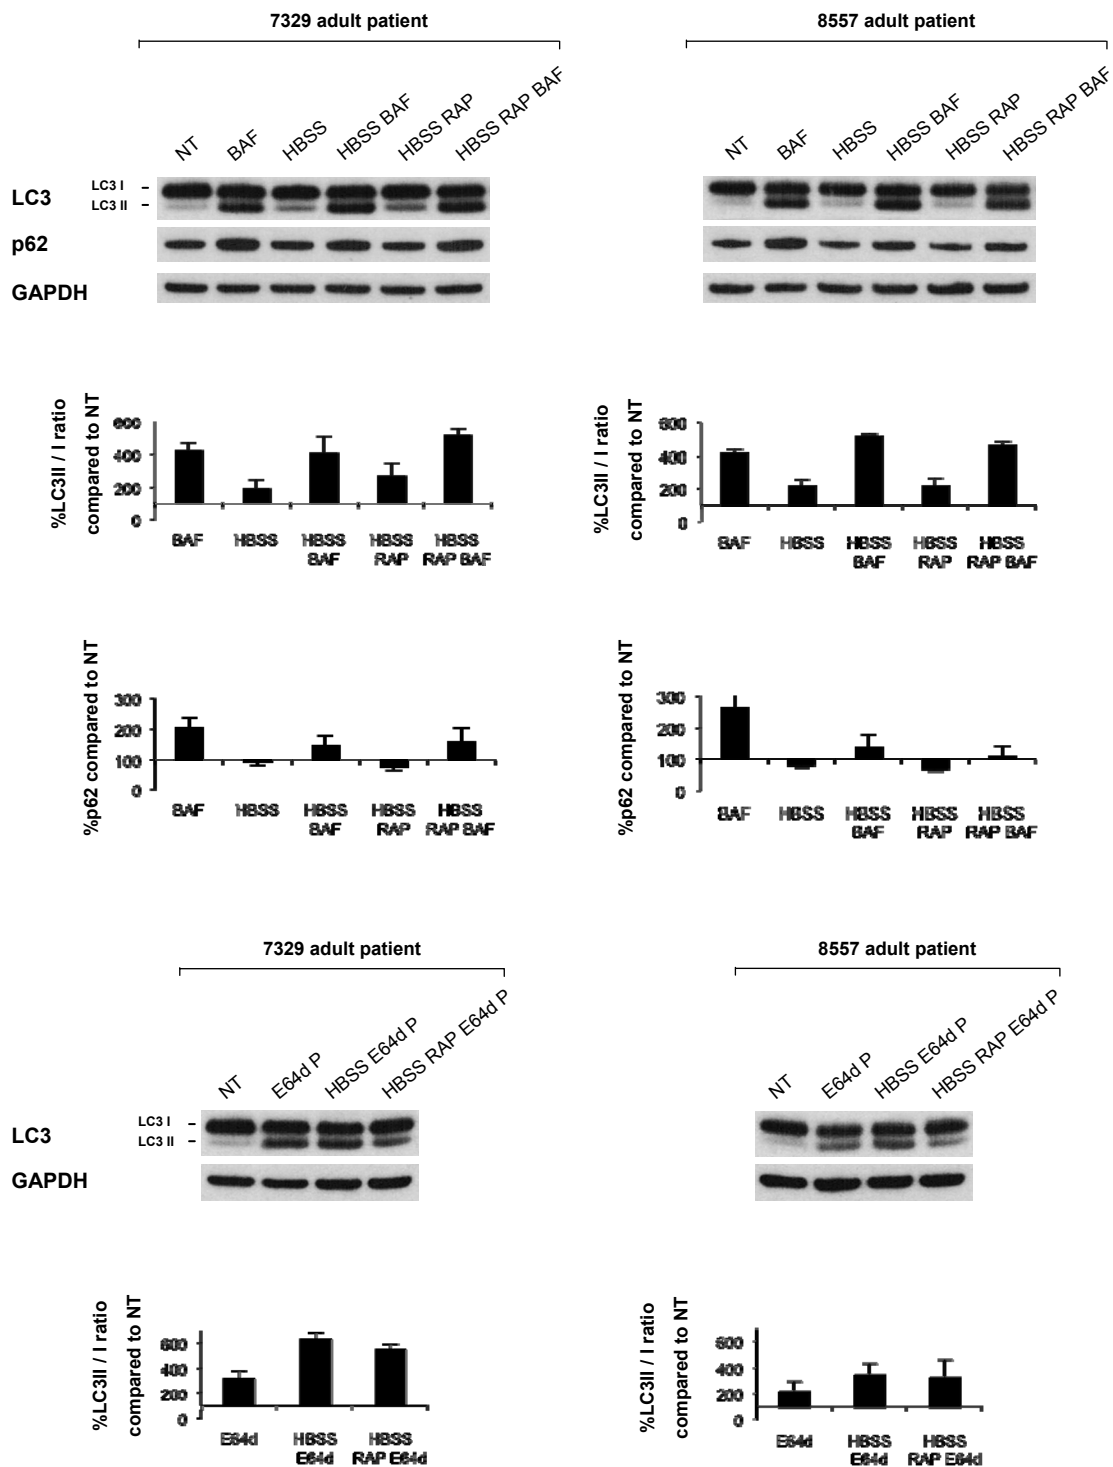

**Figure S5.** Autophagic flux has been monitored in myotubes of adult GSDII patients. Immunoblots of LC3II/LC3I, p62 and the loading control (GAPDH). Autophagy was induced by starvation medium (HBSS), starvation medium with rapamycin (HBSS RAP). Treatments lasted for 6 hours in presence or absence of the lysosome inhibitors bafilomycin A1 (BAF), E64d/Pepstatin A (P). NT: untreated. Densitometric quantification of western blots was normalized for NT samples.
