# Supplementary material
Source: PubMed Central journal article supplement (PMC3438501)

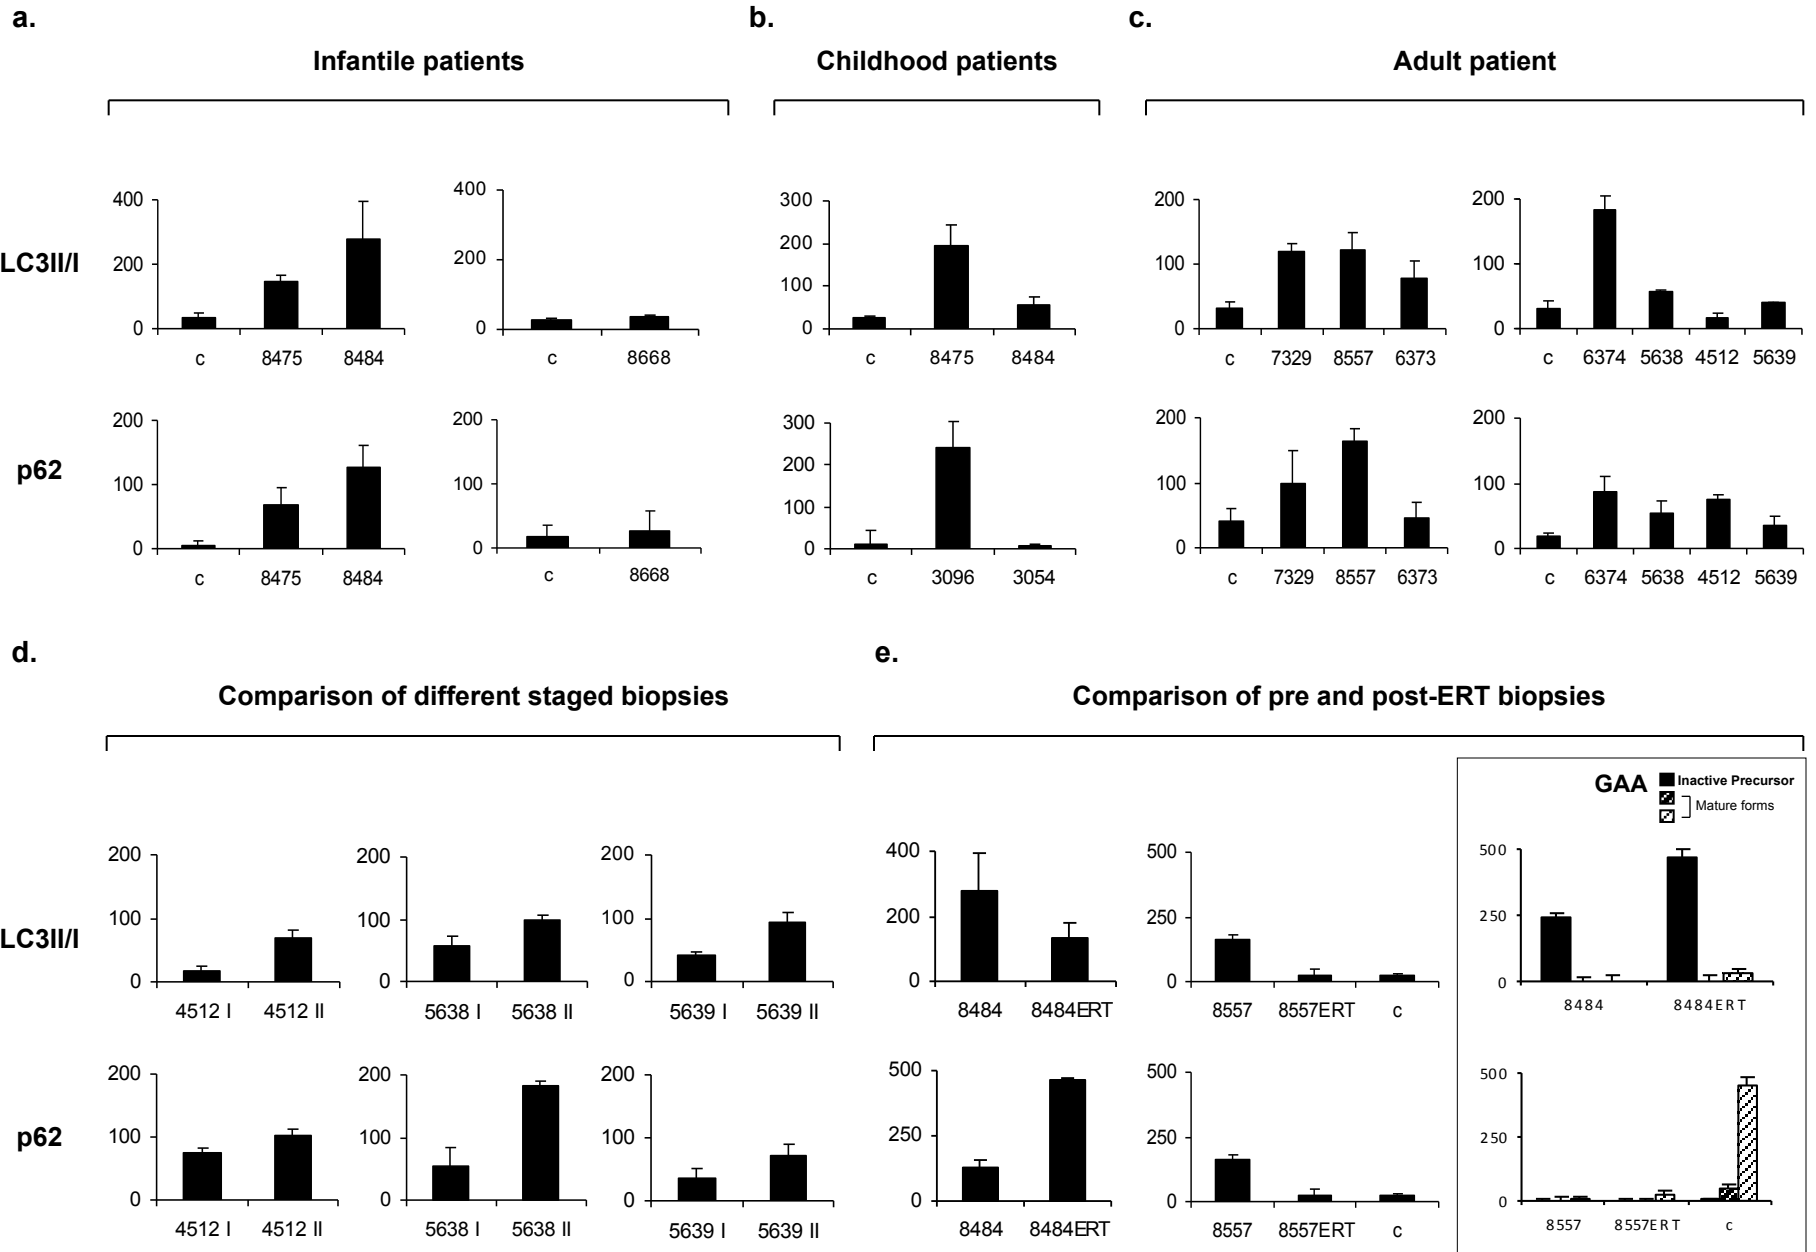

**Figure S1.** Densitometric analysis of immunoblots of controls (c) and patients (numbers).

Supplement: cdd201252x2.pdf [file cdd201252x2.pdf]
